# Supplementary material for: A fluorescent molecular logic gate with multiply-configurable dual outputs
Source: Royal Society of Chemistry journal article supplement (doi:10.1039/b510800d), 2005-01-01
Supplement: b510800d.pdf [file b510800d.pdf]

Supplementary Material for Chemical Communications  
This journal is © The Royal Society of Chemistry 2005

## **Supplementary data**

### **A fluorescent molecular logic gate with multiply-configurable dual outputs†**

**Yasuhiro Shiraishi,\* Yasufumi Tokitoh and Takayuki Hirai**

## A fluorescent molecular logic gate with multiply-configurable dual outputs

Yasuhiro Shiraishi,\* Yasufumi Tokitoh, and Takayuki Hirai

Research Center for Solar Energy Chemistry, and Division of Chemical Engineering, Graduate School of Engineering Science, Osaka University, Toyonaka 560-8531, Japan. E-mail: shiraish@cheng.es.osaka-u.ac.jp

### Electronic Supplementary Information (ESI†)

**Table S1.** Stepwise protonation constants of **L** determined in aqueous NaCl (0.15 M) solution at 298 K.<sup>a</sup>

| Reaction <sup>b</sup>                   |             |
|-----------------------------------------|-------------|
| H + L ↔ HL                              | 9.45 ± 0.06 |
| H + HL ↔ H <sub>2</sub> L               | 7.55 ± 0.16 |
| H + H <sub>2</sub> L ↔ H <sub>3</sub> L | 6.01 ± 0.30 |
| Log β                                   | 23.01       |

<sup>a</sup>Potentiometric measurements were carried out in aqueous NaCl (0.15 M) solution at 298 K. The program HYPERQUAD (Sabatini, A.; Vacca, A.; Gans, P. *Coord. Chem. Rev.* **1992**, *120*, 389–405.) was used for determination of the protonation constants.

<sup>b</sup>Charges are omitted for clarity.

**Table S2.** Stability constants for interaction between **L** and metal cations (Zn<sup>2+</sup>, Hg<sup>2+</sup>, Cu<sup>2+</sup>, and Ag<sup>+</sup>) determined in aqueous NaCl (0.15 M) solution at 298 K.<sup>a</sup>

| Reaction <sup>b</sup>                          | Zn <sup>2+</sup> | Hg <sup>2+</sup> | Cu <sup>2+</sup> | Ag <sup>+</sup> |
|------------------------------------------------|------------------|------------------|------------------|-----------------|
| M + L ↔ ML                                     | 8.92 ± 0.05      | 24.9 ± 0.12      | 17.6 ± 0.31      | 7.20 ± 0.17     |
| ML + H ↔ MHL                                   | 6.97             | 4.3              | 3.81             | 8.39            |
| M + LH ↔ MHL                                   | 6.84             | 20.1             | 12.4             | 6.54            |
| ML + OH ↔ ML(OH)                               | 4.41             | 8.00             | 10.0             | 4.84            |
| ML(OH) + OH ↔ ML(OH) <sub>2</sub>              | 4.80             | 6.38             | 9.59             | –               |
| ML(OH) <sub>2</sub> + OH ↔ ML(OH) <sub>3</sub> | –                | –                | 4.74             | –               |
| M + L + H <sub>2</sub> O ↔ ML(OH) + H          | –0.47 ± 0.24     | 19.1 ± 0.15      | 13.8 ± 0.27      | –1.76 ± 0.13    |

<sup>a</sup>Potentiometric measurements were carried out in aqueous NaCl (0.15 M) solution at 298 K. The program HYPERQUAD (Sabatini, A.; Vacca, A.; Gans, P. *Coord. Chem. Rev.* **1992**, *120*, 389–405.) was used for determination of the stability constants.

<sup>b</sup>Charges are omitted for clarity.

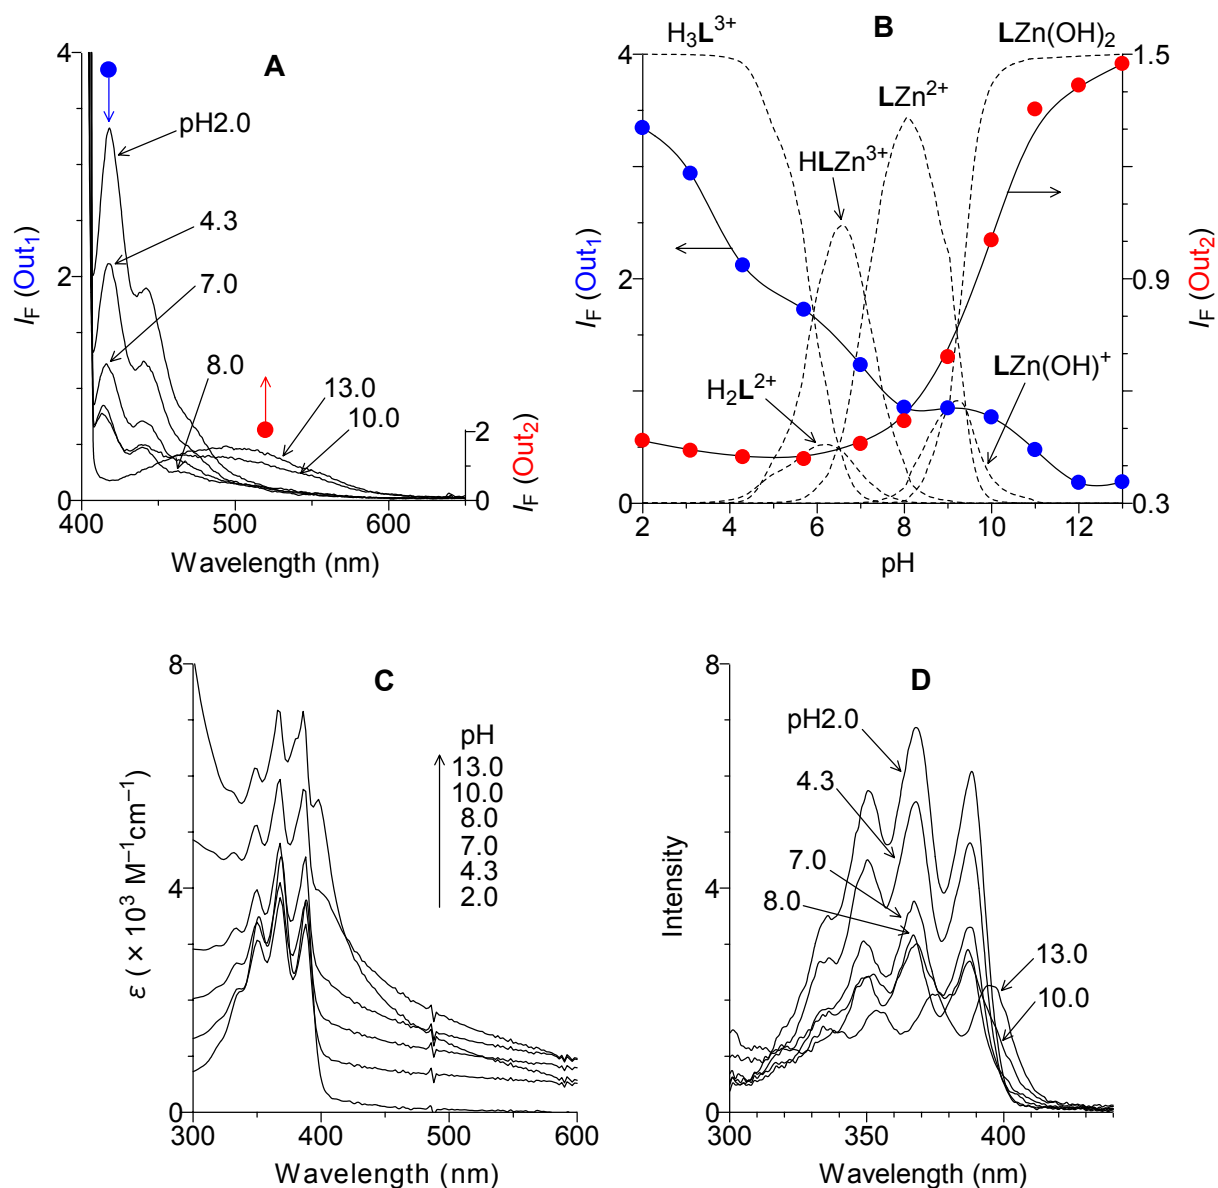

**Fig. S1** (A) pH-dependent change in fluorescence spectra ( $\lambda_{ex} = 402$  nm) of L (70  $\mu$ M) in the presence of 1.0 eq. Zn<sup>2+</sup> in aqueous NaCl (0.15 M) solution at 298 K. (B) Mole fraction distribution of the species and intensities of the fluorescence emissions at  $\lambda_{em} = 416$  nm [blue:  $I_F$ (Out<sub>1</sub>)] and 520 nm [red:  $I_F$ (Out<sub>2</sub>)]. The emission intensity of L in the absence of metals at pH 8 monitoring at 416 nm [ $I_F$ (Out<sub>1</sub>)] is set as 1. The emission intensity of L in the absence of metals at pH 10 monitoring at 520 nm [ $I_F$ (Out<sub>2</sub>)] is set as 1. (C) Absorption and (D) excitation spectra ( $\lambda_{em} = 520$  nm).

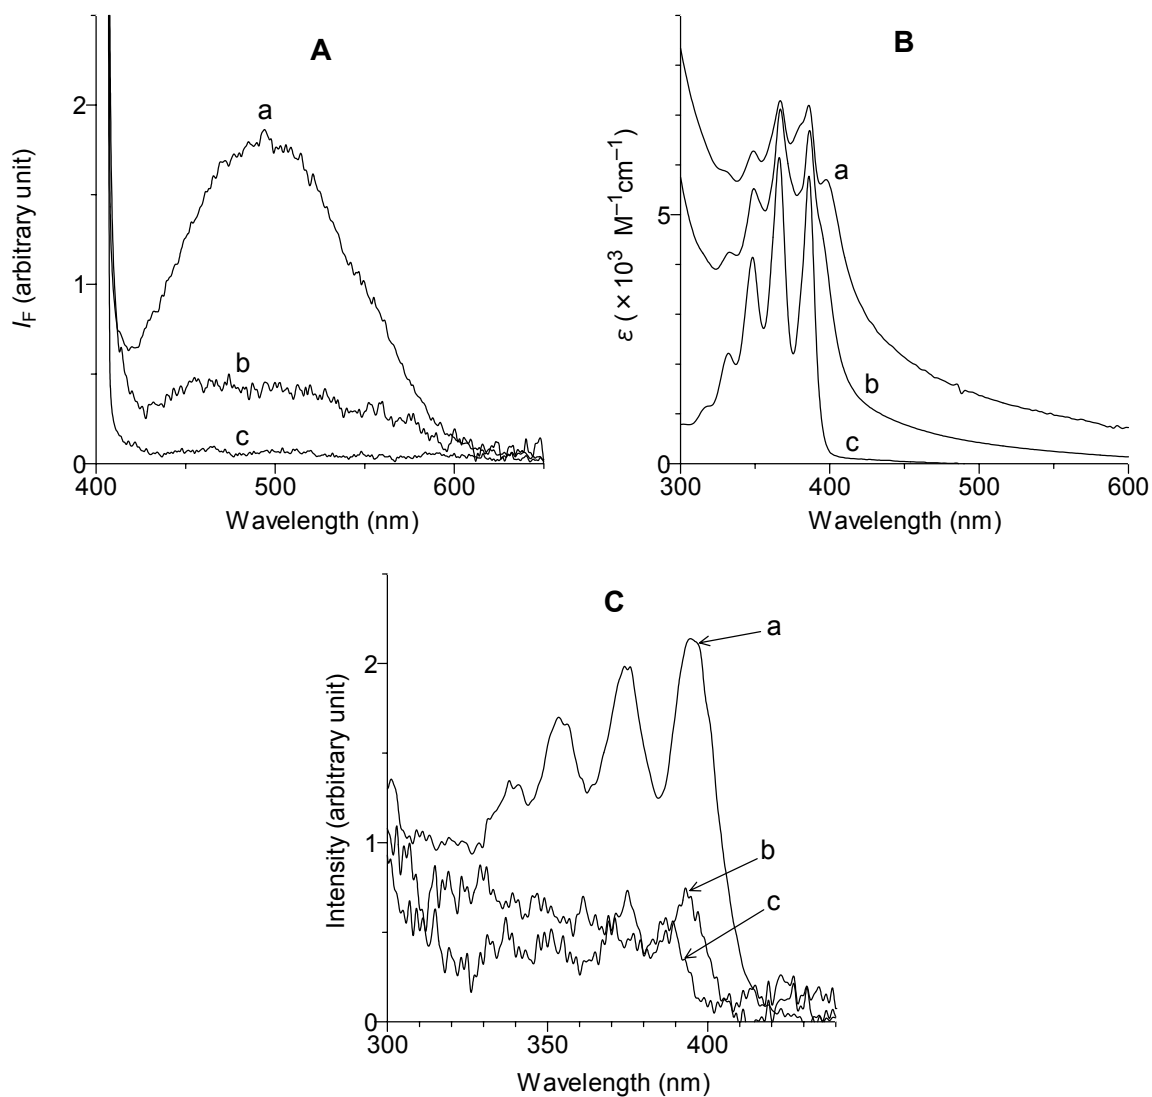

**Fig. S2** (A) Fluorescence ( $\lambda_{\text{ex}} = 402 \text{ nm}$ ), (B) absorption, and (C) excitation spectra ( $\lambda_{\text{em}} = 520 \text{ nm}$ ) of **L** (70  $\mu\text{M}$ ) dissolved in various solvents of pH 11.0 at 298 K in the presence of 1.0 eq  $\text{Zn}^{2+}$ . The respective solvents are: (a) water, (b) water/acetonitrile (9/1 v/v), and (c) water/acetonitrile (1/1 v/v).

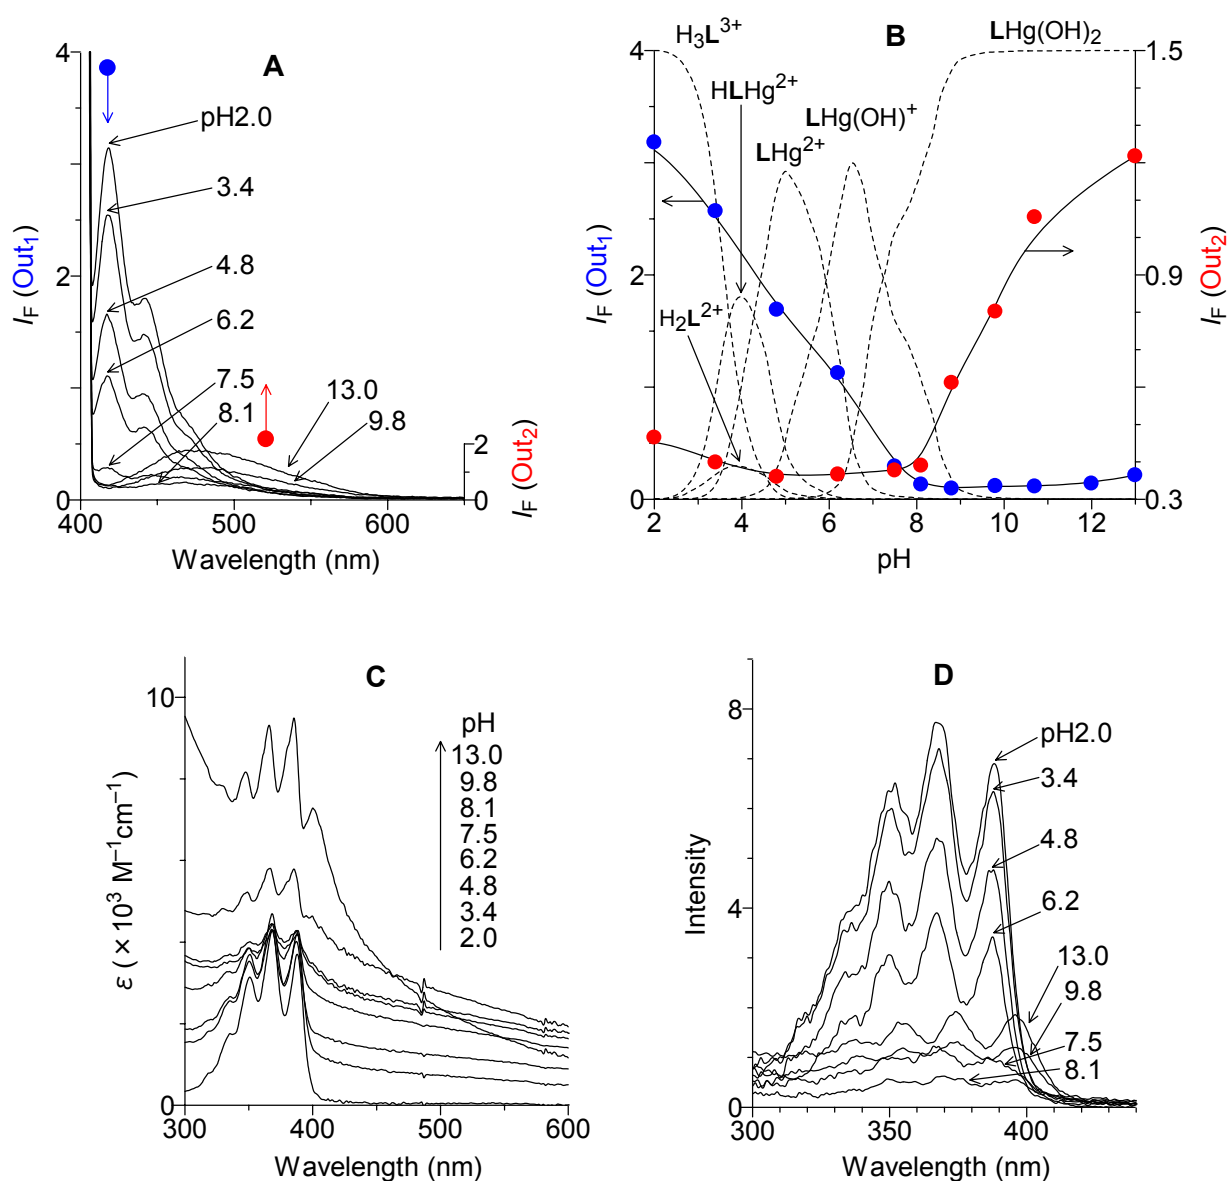

**Fig. S3** (A) pH-dependent change in fluorescence spectra ( $\lambda_{ex} = 402$  nm) of L (70 μM) in the presence of 1.0 eq. Hg<sup>2+</sup> in aqueous NaCl (0.15 M) solution at 298 K. (B) Mole fraction distribution of the species and intensities of the fluorescence emissions at  $\lambda_{em} = 416$  nm [blue:  $I_F$ (Out<sub>1</sub>)] and 520 nm [red:  $I_F$ (Out<sub>2</sub>)]. The emission intensity of L in the absence of metals at pH 8 monitoring at 416 nm [ $I_F$ (Out<sub>1</sub>)] is set as 1. The emission intensity of L in the absence of metals at pH 10 monitoring at 520 nm [ $I_F$ (Out<sub>2</sub>)] is set as 1. (C) Absorption and (D) excitation spectra ( $\lambda_{em} = 520$  nm).

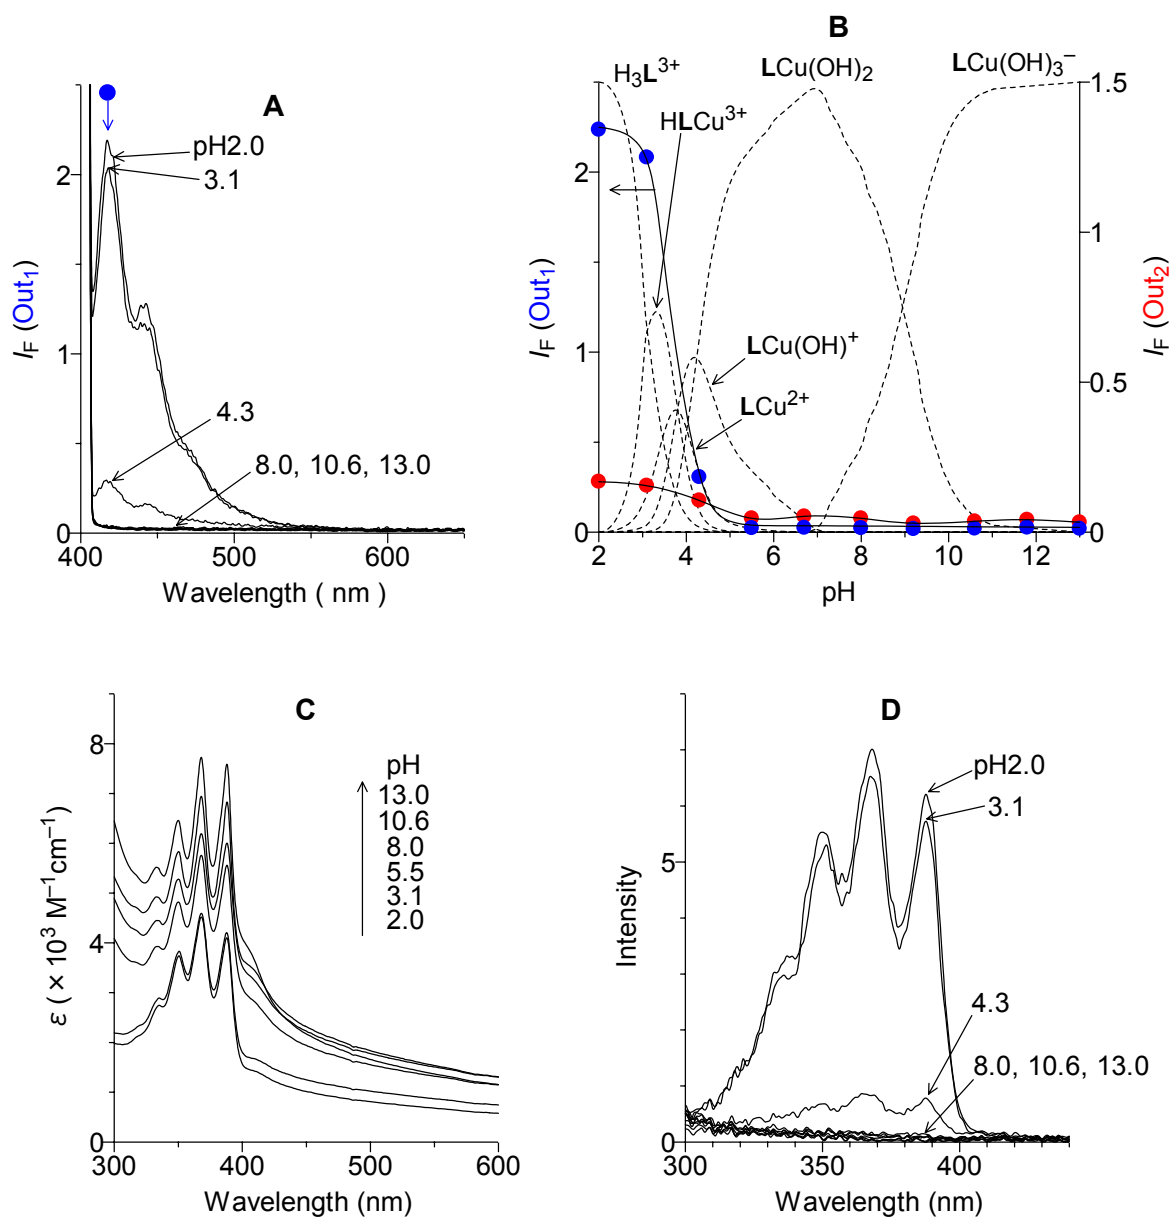

**Fig. S4** (A) pH-dependent change in fluorescence spectra ( $\lambda_{\text{ex}} = 402$  nm) of **L** (70  $\mu\text{M}$ ) in the presence of 1.0 eq.  $\text{Cu}^{2+}$  in aqueous NaCl (0.15 M) solution at 298 K. (B) Mole fraction distribution of the species and intensities of the fluorescence emissions at  $\lambda_{\text{em}} = 416$  nm [blue:  $I_F(\text{Out}_1)$ ] and 520 nm [red:  $I_F(\text{Out}_2)$ ]. The emission intensity of **L** in the absence of metals at pH 8 monitoring at 416 nm [ $I_F(\text{Out}_1)$ ] is set as 1. The emission intensity of **L** in the absence of metals at pH 10 monitoring at 520 nm [ $I_F(\text{Out}_2)$ ] is set as 1. (C) Absorption and (D) excitation spectra ( $\lambda_{\text{em}} = 520$  nm).

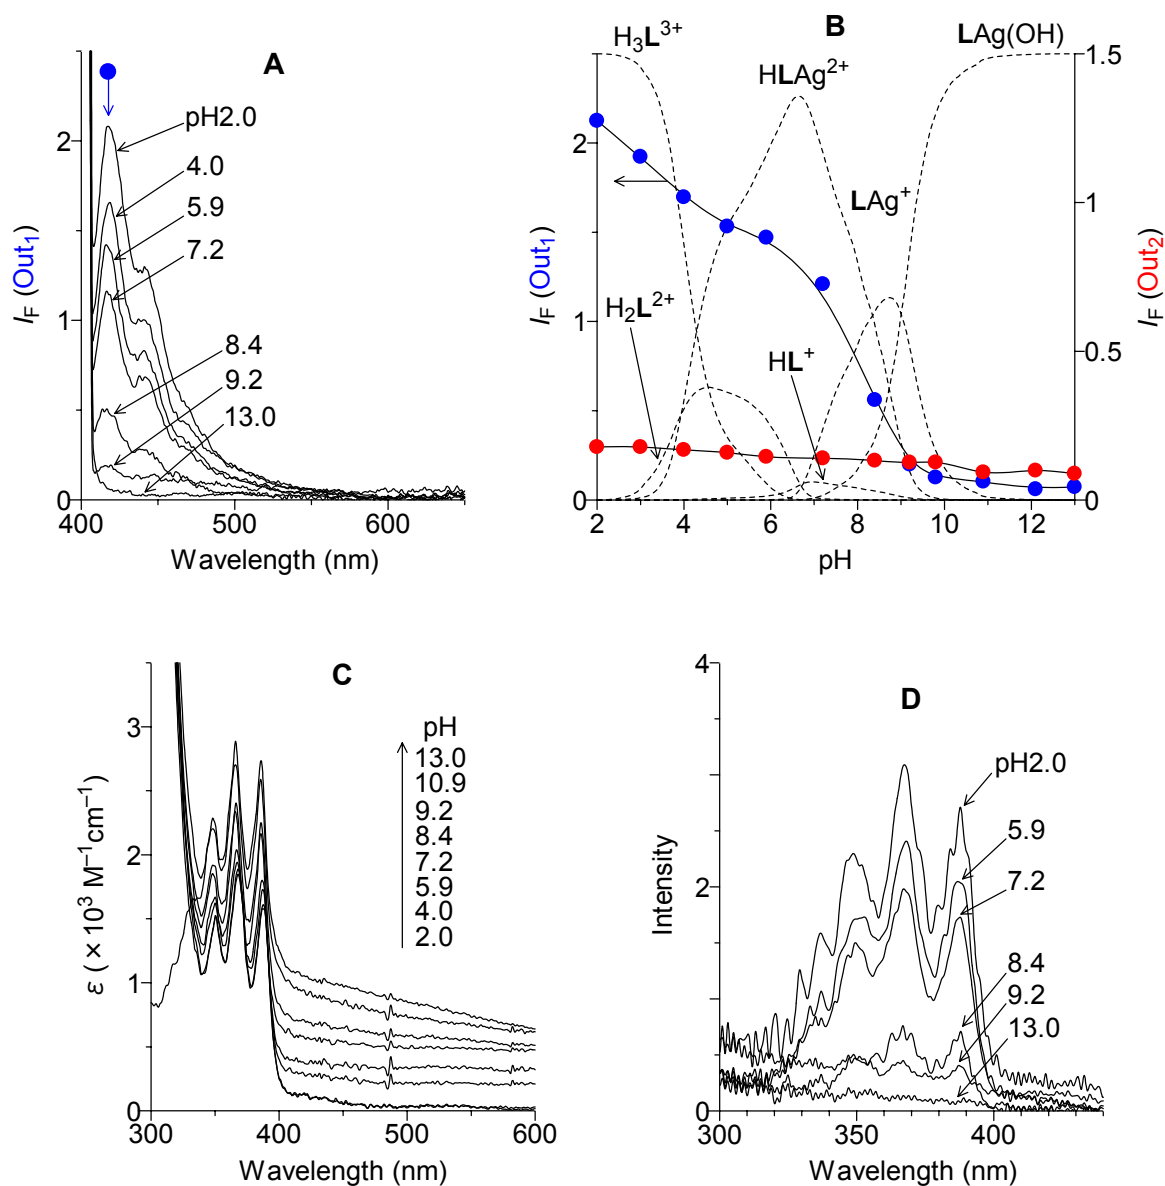

**Fig. S5** (A) pH-dependent change in fluorescence spectra ( $\lambda_{\text{ex}} = 402 \text{ nm}$ ) of **L** (70  $\mu\text{M}$ ) in the presence of 1.0 eq.  $\text{Ag}^+$  in aqueous NaCl (0.15 M) solution at 298 K. (B) Mole fraction distribution of the species and intensities of the fluorescence emissions at  $\lambda_{\text{em}} = 416 \text{ nm}$  [blue:  $I_F(\text{Out}_1)$ ] and 520 nm [red:  $I_F(\text{Out}_2)$ ]. The emission intensity of **L** in the absence of metals at pH 8 monitoring at 416 nm [ $I_F(\text{Out}_1)$ ] is set as 1. The emission intensity of **L** in the absence of metals at pH 10 monitoring at 520 nm [ $I_F(\text{Out}_2)$ ] is set as 1. (C) Absorption and (D) excitation spectra ( $\lambda_{\text{em}} = 520 \text{ nm}$ ).

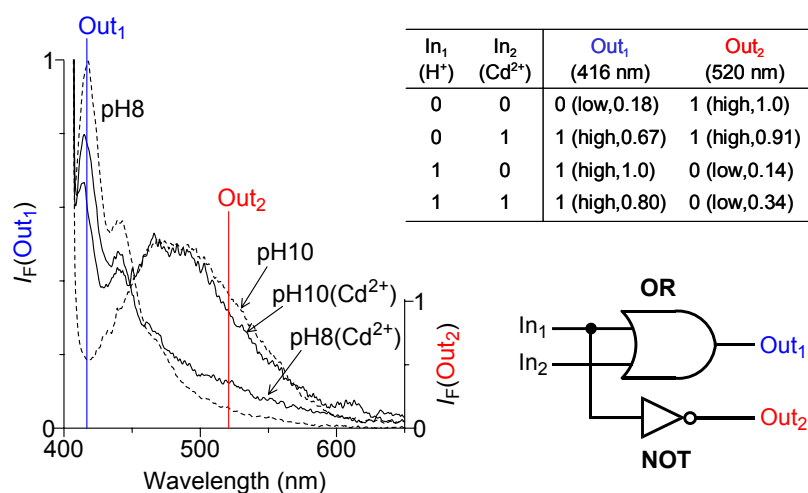

**Fig. S6** Fluorescence spectra ( $\lambda_{\text{ex}} = 402 \text{ nm}$ ) of **L** ( $70 \mu\text{M}$ ) in the absence and presence of 1 eq.  $\text{Cd}^{2+}$  in aqueous NaCl (0.15 M) solution at 298 K, truth table, and logic scheme.

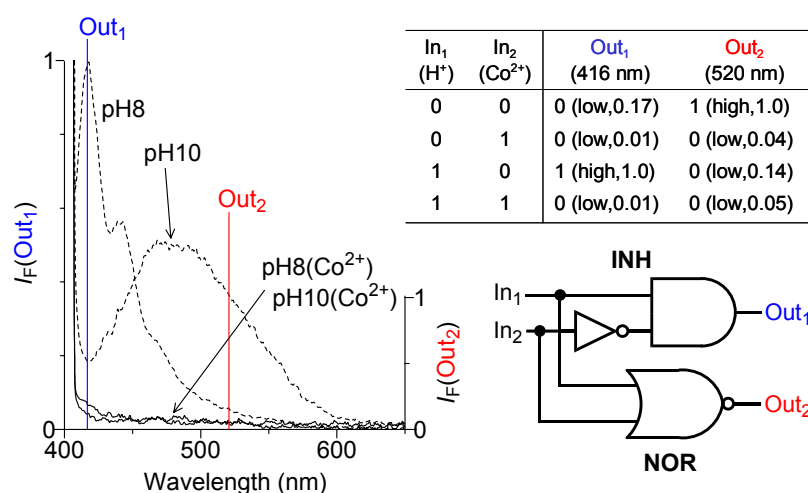

**Fig. S7** Fluorescence spectra ( $\lambda_{\text{ex}} = 402 \text{ nm}$ ) of **L** ( $70 \mu\text{M}$ ) in the absence and presence of 1 eq.  $\text{Co}^{2+}$  in aqueous NaCl (0.15 M) solution at 298 K, truth table, and logic scheme.

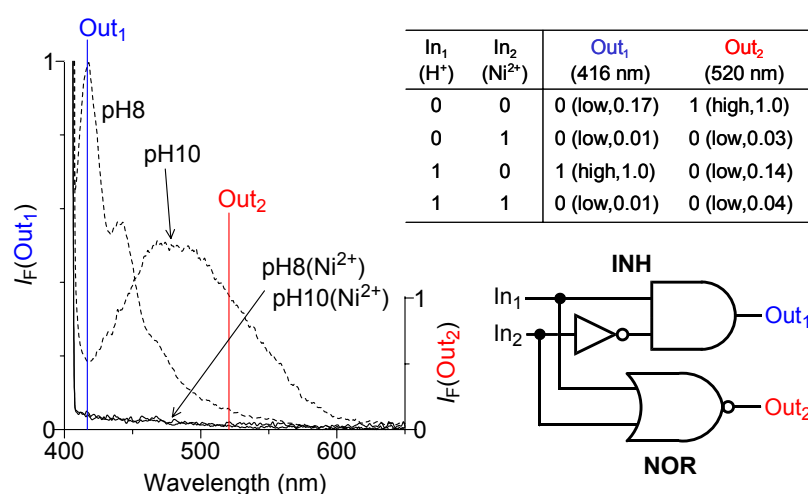

**Fig. S8** Fluorescence spectra ( $\lambda_{\text{ex}} = 402 \text{ nm}$ ) of **L** ( $70 \mu\text{M}$ ) in the absence and presence of 1 eq.  $\text{Ni}^{2+}$  in aqueous NaCl (0.15 M) solution at 298 K, truth table, and logic scheme.



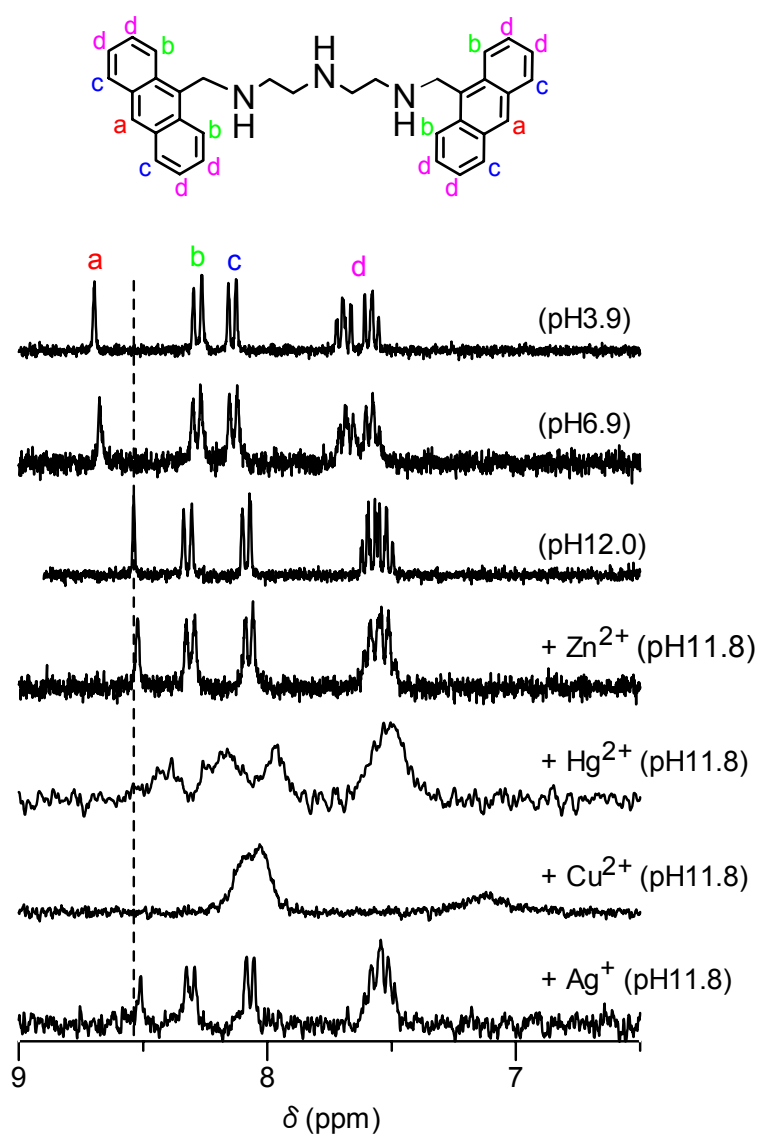

**Fig. S9** <sup>1</sup>H NMR spectra of **L** obtained in the absence and presence of metal cations (1 eq.) in D<sub>2</sub>O (pH = pD - 0.4).
